# Supplementary material for: Neonatal Acute Kidney Injury: A Survey of Practices in Canadian Neonatal Intensive Care Units
Source: Research Square preprint supplement (doi:10.21203/rs.3.rs-8001944/v1), 2025-11-14
Supplement: Supplementary file 1 [file 1633f3c4354671d5bed7958e.docx]

**Appendix 1 – List of Participating Sites**

Alberta Children's Hospital, British Columbia Children's Hospital, Cape Breton Regional Hospital, Centre Hospitalier de Quebec, Centre Hospitalier Universitaire de Sherbrooke, Dr. Everett Chalmers Hospital, Foothill's Medical Centre, Hamilton Health Sciences Centre, Hospital for Sick Children, IWK Health Centre, Janeway Children's Health & Rehabilitation Centre, Jewish General Hospital, London Health Sciences Centre, Moncton Hospital, Montreal Children's Hospital, Mount Sinai Hospital, Regina Regional Hospital, Royal Alexandra Hospital & Stollery Children's Hospital, Royal Columbian Hospital, Saint John Regional Hospital, St. Boniface General Hospital, Sunnybrook Health Sciences Centre, The Ottawa Hospital, Victoria General Hospital, Windsor Regional Hospital, Winnipeg Health Sciences Centre
