# Supplementary material for: Neonatal Acute Kidney Injury: A Survey of Practices in Canadian Neonatal Intensive Care Units
Source: Research Square preprint supplement (doi:10.21203/rs.3.rs-8001944/v1), 2025-11-14
Supplement: Supplementary file 2 [file c12bd6db2ed9ff98cef1587d.docx]

# List of CNN Site Investigators:

Marc Beltempo, MD (Director, Canadian Neonatal Network and Site Investigator), Montreal Children’s Hospital at McGill University Health Centre, Montréal, Québec; Prakesh S Shah, MD, MSc, Mount Sinai Hospital, Toronto, ON; Thevanisha Pillay, MD, Victoria General Hospital, Victoria, British Columbia; Jonathan Wong, MD, British Columbia Women’s Hospital, Vancouver, British Columbia; Miroslav Stavel, MD, Royal Columbian Hospital, New Westminster, British Columbia; Rebecca Sherlock, MD, Surrey Memorial Hospital, Surrey, British Columbia; Ayman Abou Mehrem, MD, Foothills Medical Centre, Calgary, AB; Jennifer Toye, MD, and Joseph Ting, MD, Royal Alexandra Hospital and University of Alberta Hospital, Edmonton, Alberta; Carlos Fajardo, MD, Alberta Children’s Hospital, Calgary, AB; Andrei Harabor, MD, Regina General Hospital, Regina, SK; Lannae Strueby, MD, Jim Pattison Children’s Hospital, Saskatoon, SK; Mary Seshia, MBChB, and Deepak Louis, MD, Winnipeg Health Sciences Centre, Winnipeg, MB; Chelsea Ruth, MD, and Ann Yi, MD, St. Boniface General Hospital, Winnipeg, MB; Amit Mukerji, MD, Hamilton Health Sciences Centre, Hamilton, ON; Orlando Da Silva, MD, MSc, London Health Sciences Centre, London, ON; Sajit Augustine, MD, Windsor Regional Hospital, Windsor, ON; Kyong-Soon Lee, MD, MSc, Hospital for Sick Children, Toronto, ON; Eugene Ng, MD, Sunnybrook Health Sciences Centre, Toronto, ON; Brigitte Lemyre, MD, The Ottawa Hospital, Ottawa, ON; Brigitte Lemyre, MD, Children’s Hospital of Eastern ON, Ottawa, ON; Faiza Khurshid, MD, Kingston General Hospital, Kingston, ON; Victoria Bizgu, MD, Jewish General Hospital, Montréal, Québec; Keith Barrington, MBChB, Anie Lapointe, MD, and Guillaume Ethier, NNP, Hôpital Sainte-Justine, Montréal, Québec; Christine Drolet, MD, Centre Hospitalier Universitaire de Québec, Sainte Foy, Québec; Martine Claveau, MSc, LLM, NNP, Montreal Children’s Hospital at McGill University Health Centre, Montréal, Québec; Marie St-Hilaire, MD, Hôpital Maisonneuve-Rosemont, Montréal, Québec; Valerie Bertelle, MD, and Edith Masse, MD, Centre Hospitalier Universitaire de Sherbrooke, Sherbrooke, Québec; Caio Barbosa de Oliveira, MD, Moncton Hospital, Moncton, New Brunswick; Hala Makary, MD, Dr. Everett Chalmers Hospital, Fredericton, New Brunswick; Gabriela de Carvalho Nunes, MD, and Wissam Alburaki, MD, Saint John Regional Hospital, Saint John, New Brunswick; Jo-Anna Hudson, MD, Janeway Children’s Health and Rehabilitation Centre, St. John’s, Newfoundland; Jehier Afifi, MB BCh, MSc, IWK Health Centre, Halifax, Nova Scotia; Andrzej Kajetanowicz, MD, Cape Breton Regional Hospital, Sydney, Nova Scotia; Bruno Piedboeuf, MD (Chairman, Canadian Neonatal Network), Centre Hospitalier Universitaire de Québec, Sainte Foy, Québec.
