# Supplementary material for: Neonatal Acute Kidney Injury: A Survey of Practices in Canadian Neonatal Intensive Care Units
Source: Research Square preprint supplement (doi:10.21203/rs.3.rs-8001944/v1), 2025-11-14
Supplement: Supplementary file 3 [file edc967b83c242b9d7d725653.docx]

**Appendix 2 – List of Survey Questions**

| **#** | **Question** | **Responses allowed** |
| --- | --- | --- |
| **1** | In which unit do you practice? | *Dropdown list of all CNN participating sites* |
| **2** | Does your unit have the following services on site (i.e. within the same NICU)  (check all that apply)? | Pediatric nephrology consultation  Renal peritoneal dialysis  Renal haemodialysis |
| **3** | Do you monitor the incidence of AKI among infants born at < 33 weeks GA in your unit? | - Yes - We follow certain definition(s) to track the incidence of AKI - No - We do not track the incidence of AKI - I am not sure |
| **3a** | Which definition of AKI does your unit apply in tracking the incidence of AKI?  (Check all that apply) | If urine output < 0.5mL/kg/hr over 24-hour  If urine output < 1mL/kg/hr over 24-hour  KDIGO criteria  At attending team's discretion  I don't know |
| **4** | When does your site monitor serum creatine levels among infants born at < 33 weeks GA? (Check all that apply) (excluding the urea/creatinine monitoring for monitoring of TPN use) | Never  Within 24 hours of birth (as routine)  24–48 hours after birth (as routine)  48–72 hours after birth (as routine)  72 hours–day 7 after birth (as routine)  After day 7 of birth (as routine)  Before we start vancomycin  After we finish vancomycin  When we use vancomycin for >48 hours  Before we start aminoglycosides  After we finish aminoglycosides  When we use aminoglycosides for >48 hours  Before we start NSAID  After we finish NSAID  When the infant meets other criteria for renal effects  As part of sepsis workup  If urine output <0.5 mL/kg/hr over 24 hours  If urine output <1 mL/kg/hr over 24 hours  Others: *please describe* |
| **5** | Does your unit measure patient's daily weight? | - Yes - No - At physician’s discretion |
| **6** | Does your unit measure daily fluid input output? | - Yes - No - At physician’s discretion |
| **7** | For which patients do your unit arrange follow-up after discharge from NICU for possible long term renal dysfunction?  (Check all that apply) | Those who developed a 50% increase in serum creatinine (1.5×) from the baseline level  Those who had at least a doubling of serum creatinine (2×) from the baseline level  Those with multiple episodes of creatinine increase in the NICU (1.5–3×) from the baseline level  Those requiring renal replacement therapy in the NICU  Those with an AKI of any severity whose renal function has not returned to normal by the time of discharge  Infant with nephrocalcinosis  Infant with congenital renal anomaly  Infant with hypertension who received any treatment  At team’s discretion  If requested by the nephrology team |
